# Supplementary material
Source: MDPI journal article supplement (https://www.mdpi.com/2073-4395/11/11/2269)
Supplement: s1 [file s1]

## Supplementary Data

**Table S1.** Thirty genotypes of barley and their origin, maturity type and row type and sensitivity to waterlogging. S – spring; W - winter

| Genotype    | Origin    | Winter/spring<br>type | Row type |
|-------------|-----------|-----------------------|----------|
| YUQS        | China     | S                     | 2        |
| YYXT        | China     | W/S                   | 2        |
| ZP2         | China     | S                     | 2        |
| ZUG293      | China     | S                     | 6        |
| ZUG403      | China     | S                     | 2        |
| DYSYH       | China     | W                     | 6        |
| Gebeina     | China     | S                     | 2        |
| Yiwu Erleng | China     | W                     | 6        |
| YSM1        | China     | S                     | 2        |
| YSM3        | China     | S                     | 2        |
| Yu6472      | China     | S                     | 2        |
| TX9425      | China     | S                     | 2        |
| Yan89110    | China     | S                     | 2        |
| Yan90260    | China     | S                     | 2        |
| RGZLL       | China     | W                     | 6        |
| Flagship    | Australia | S                     | 2        |
| Keel        | Australia | S                     | 2        |
| Schooner    | Australia | S                     | 2        |
| Skiff       | Australia | S                     | 2        |
| Dash        | Australia | S                     | 2        |
| TF026       | Australia | S                     | 2        |
| YF374       | Australia | S                     | 2        |
| Franklin    | Australia | S                     | 2        |
| Gairdner    | Australia | S                     | 2        |
| Yerong      | Australia | S                     | 6        |
| CM72        | USA       | S                     | 6        |
| Dayton      | USA       | W                     | 6        |
| Numar       | USA       | S                     | 6        |
| Kinu Nijo 6 | Japan     | S                     | 2        |
| Naso Nijo   | Japan     | S                     | 2        |

**Table S2.** Genotypic variability in height cm/plant of plants grown under various K<sup>+</sup> supply. Data are mean  $\pm$  SE (n = 6). Genotypes have been divided into three group according to cluster analysis (see section 3.1 and Figure1).

|            | Genotype    | K <sup>+</sup> concentration (mM) |               |               |               |
|------------|-------------|-----------------------------------|---------------|---------------|---------------|
|            |             | 0.002 mM                          | 0.02 mM       | 2 mM          | 20 mM         |
| <b>G 1</b> | ZuG403      | 1.7 $\pm$ 0.3                     | 4.9 $\pm$ 1.4 | 5.5 $\pm$ 0.2 | 4.3 $\pm$ 0.3 |
|            | YUQS        | 1.2 $\pm$ 0.8                     | 4.4 $\pm$ 0.6 | 2.9 $\pm$ 0.2 | 3.6 $\pm$ 0.3 |
|            | Keel        | 2.5 $\pm$ 0.1                     | 2.2 $\pm$ 0.5 | 3.3 $\pm$ 0.8 | 3.2 $\pm$ 0.2 |
|            | YSM1        | 1.9 $\pm$ 0.4                     | 2.8 $\pm$ 0.3 | 1.9 $\pm$ 0.3 | 2.4 $\pm$ 0.6 |
|            | YSM3        | 1.8 $\pm$ 0.2                     | 2.6 $\pm$ 0.1 | 2.7 $\pm$ 0.3 | 1.8 $\pm$ 0.1 |
|            | ZP2         | 2.1 $\pm$ 0.4                     | 4.3 $\pm$ 0.3 | 2.7 $\pm$ 0.2 | 3.3 $\pm$ 0.1 |
|            | Flagship    | 2.8 $\pm$ 0.1                     | 2.8 $\pm$ 1.1 | 2.7 $\pm$ 0.2 | 1.8 $\pm$ 0.8 |
|            | Dash        | 1.1 $\pm$ 0.1                     | 2.1 $\pm$ 0.3 | 2 $\pm$ 0.1   | 1.4 $\pm$ 0.1 |
|            | Gebeina     | 0.9 $\pm$ 0.1                     | 4.1 $\pm$ 0.9 | 2.8 $\pm$ 0.2 | 2 $\pm$ 0.4   |
| <b>G 2</b> | Skiff       | 2.9 $\pm$ 0.1                     | 2.5 $\pm$ 0.2 | 3.4 $\pm$ 0.6 | 2.5 $\pm$ 0.2 |
|            | ZUG293      | 1.1 $\pm$ 0.1                     | 2.8 $\pm$ 0.1 | 2.3 $\pm$ 0.1 | 5.2 $\pm$ 0.1 |
|            | Gairdner    | 1.2 $\pm$ 0.1                     | 1.8 $\pm$ 0.3 | 2.3 $\pm$ 0.1 | 1.9 $\pm$ 0.3 |
|            | Yerong      | 1.7 $\pm$ 0.2                     | 1.8 $\pm$ 0.1 | 1.6 $\pm$ 0.1 | 1.4 $\pm$ 0.1 |
|            | Schooner    | 2.3 $\pm$ 0.2                     | 1.8 $\pm$ 0.3 | 2.3 $\pm$ 0.3 | 2.2 $\pm$ 0.1 |
|            | YF374       | 2.6 $\pm$ 0.1                     | 3.4 $\pm$ 0.8 | 3.5 $\pm$ 0.1 | 2.1 $\pm$ 0.6 |
|            | CM72        | 1.8 $\pm$ 0.3                     | 2.5 $\pm$ 0.5 | 3.1 $\pm$ 0.4 | 3.9 $\pm$ 0.3 |
| <b>G 3</b> | RGZLL       | 0.1 $\pm$ 0.1                     | 0.8 $\pm$ 0.1 | 1.6 $\pm$ 0.1 | 1.3 $\pm$ 0.3 |
|            | Yan90260    | 2.2 $\pm$ 0.2                     | 1.2 $\pm$ 0.2 | 2.6 $\pm$ 0.9 | 1.4 $\pm$ 0.4 |
|            | Yiwu Rrleng | 1.2 $\pm$ 1.2                     | 1.8 $\pm$ 0.2 | 1 $\pm$ 0.7   | 0.7 $\pm$ 0.3 |
|            | Dayton      | 0.1 $\pm$ 0.1                     | 0.8 $\pm$ 0.1 | 1.1 $\pm$ 0.1 | 1.9 $\pm$ 0.1 |
|            | DYSYH       | 0.1 $\pm$ 0.1                     | 1 $\pm$ 0.1   | 1.2 $\pm$ 0.3 | 1.3 $\pm$ 0.3 |
|            | Yan89110    | 2 $\pm$ 0.5                       | 1.6 $\pm$ 0.1 | 2.8 $\pm$ 0.4 | 1.3 $\pm$ 0.1 |
|            | Numar       | 1.4 $\pm$ 0.3                     | 2.6 $\pm$ 0.1 | 3.3 $\pm$ 0.1 | 2.3 $\pm$ 0.9 |
|            | Yu 6472     | 1.6 $\pm$ 0.1                     | 1.8 $\pm$ 0.3 | 2.6 $\pm$ 0.4 | 1.5 $\pm$ 0.3 |
|            | Naso Nijo   | 2.3 $\pm$ 0.2                     | 1.7 $\pm$ 0.5 | 1.6 $\pm$ 0.1 | 1.3 $\pm$ 0.1 |
|            | TX9425      | 1.8 $\pm$ 0.7                     | 2.4 $\pm$ 0.3 | 3.2 $\pm$ 0.2 | 1.5 $\pm$ 0.5 |
|            | TF026       | 2.3 $\pm$ 0.8                     | 2.1 $\pm$ 0.4 | 1.8 $\pm$ 0.1 | 2 $\pm$ 0.7   |
|            | Kinu Nijo 6 | 1.5 $\pm$ 0.2                     | 1 $\pm$ 0.1   | 0.8 $\pm$ 0.2 | 1.2 $\pm$ 0.2 |
|            | Franklin    | 0.5 $\pm$ 0.1                     | 0.3 $\pm$ 0.1 | 0.2 $\pm$ 0.2 | 2.3 $\pm$ 0.4 |
|            | YYXT        | 1 $\pm$ 0.2                       | 1 $\pm$ 0.2   | 1.7 $\pm$ 0.2 | 2.5 $\pm$ 0.1 |

**Table S3.** Genotypic variability in tiller number of plants grown under various K<sup>+</sup> supply. Data are mean  $\pm$  SE (n = 6). Genotypes have been divided into three group according to cluster analysis (see section 3.1 and Figure 1).

|            | <b>Genotype</b> | <b>0.002 mM</b> | <b>0.02 mM</b> | <b>2 mM</b>   | <b>20 mM</b>  |
|------------|-----------------|-----------------|----------------|---------------|---------------|
| <b>G 1</b> | ZuG403          | 2 $\pm$ 0.1     | 4.8 $\pm$ 1.5  | 5.8 $\pm$ 0.1 | 3.8 $\pm$ 0.5 |
|            | YUQS            | 2.5 $\pm$ 0.3   | 4.4 $\pm$ 0.8  | 4.9 $\pm$ 0.3 | 4.1 $\pm$ 0.4 |
|            | Keel            | 2.8 $\pm$ 0.1   | 2.3 $\pm$ 0.6  | 3.8 $\pm$ 0.3 | 3.9 $\pm$ 0.9 |
|            | YSM1            | 3.5 $\pm$ 0.2   | 3.3 $\pm$ 0.8  | 3.2 $\pm$ 0.2 | 3 $\pm$ 0.5   |
|            | YSM3            | 2.6 $\pm$ 0.3   | 3.4 $\pm$ 0.1  | 3.5 $\pm$ 0.3 | 3.6 $\pm$ 0.4 |
|            | ZP2             | 2.3 $\pm$ 0.3   | 4.8 $\pm$ 0.3  | 4.5 $\pm$ 0.3 | 3.8 $\pm$ 0.2 |
|            | Flagship        | 4.4 $\pm$ 0.1   | 3.3 $\pm$ 0.6  | 3.7 $\pm$ 0.8 | 2.5 $\pm$ 1.5 |
|            | Dash            | 2.1 $\pm$ 0.1   | 3.1 $\pm$ 0.6  | 4.1 $\pm$ 0.1 | 4.3 $\pm$ 0.3 |
|            | Gebeina         | 4.1 $\pm$ 0.5   | 6.3 $\pm$ 1.3  | 6.4 $\pm$ 0.6 | 2.7 $\pm$ 0.1 |
| <b>G 2</b> | Skiff           | 3.6 $\pm$ 0.3   | 5.2 $\pm$ 0.5  | 6.3 $\pm$ 0.1 | 4.4 $\pm$ 0.6 |
|            | ZUG293          | 1.7 $\pm$ 0.2   | 4.7 $\pm$ 0.1  | 5 $\pm$ 0.3   | 7.7 $\pm$ 0.1 |
|            | Gairdner        | 3.3 $\pm$ 0.3   | 5.7 $\pm$ 0.1  | 6.1 $\pm$ 0.6 | 4.5 $\pm$ 0.2 |
|            | Yerong          | 1.3 $\pm$ 0.3   | 2.2 $\pm$ 0.2  | 4.4 $\pm$ 0.4 | 2.4 $\pm$ 0.3 |
|            | Schooner        | 3.6 $\pm$ 0.3   | 5.2 $\pm$ 0.8  | 5.3 $\pm$ 0.9 | 5.7 $\pm$ 0.8 |
|            | YF374           | 2.3 $\pm$ 0.6   | 4.3 $\pm$ 1.3  | 4.3 $\pm$ 0.8 | 4.1 $\pm$ 0.9 |
|            | CM72            | 2.5 $\pm$ 0.5   | 4.2 $\pm$ 0.8  | 6.4 $\pm$ 0.3 | 3.7 $\pm$ 0.2 |
| <b>G 3</b> | RGZLL           | 2.1 $\pm$ 0.4   | 2.3 $\pm$ 0.3  | 2.8 $\pm$ 0.1 | 3.3 $\pm$ 0.2 |
|            | Yan90260        | 2.7 $\pm$ 0.1   | 2.9 $\pm$ 0.1  | 3.4 $\pm$ 1.3 | 1.5 $\pm$ 0.3 |
|            | Yiwu Rrleng     | 2.8 $\pm$ 0.8   | 3.3 $\pm$ 0.1  | 4.8 $\pm$ 0.5 | 3.8 $\pm$ 0.3 |
|            | Dayton          | 2.6 $\pm$ 0.1   | 5.3 $\pm$ 0.3  | 4.8 $\pm$ 0.9 | 3 $\pm$ 0.3   |
|            | DYSYH           | 3.6 $\pm$ 0.1   | 6.5 $\pm$ 0.3  | 5.3 $\pm$ 1.4 | 5.9 $\pm$ 0.6 |
|            | Yan89110        | 3.2 $\pm$ 0.2   | 2.8 $\pm$ 0.3  | 4.5 $\pm$ 0.2 | 2.7 $\pm$ 0.2 |
|            | Numar           | 2.2 $\pm$ 0.3   | 4.2 $\pm$ 0.2  | 4.5 $\pm$ 0.3 | 5.3 $\pm$ 0.6 |
|            | Yu 6472         | 2.1 $\pm$ 0.3   | 1.8 $\pm$ 0.7  | 3.3 $\pm$ 0.4 | 2.3 $\pm$ 0.4 |
|            | Naso Nijo       | 3.1 $\pm$ 0.1   | 2.4 $\pm$ 0.4  | 1.8 $\pm$ 0.3 | 1.8 $\pm$ 0.4 |
|            | TX9425          | 2.3 $\pm$ 0.2   | 3.6 $\pm$ 0.1  | 4.4 $\pm$ 0.1 | 2.4 $\pm$ 0.6 |
|            | TF026           | 2.6 $\pm$ 1.1   | 2.8 $\pm$ 0.5  | 4.2 $\pm$ 0.8 | 2.7 $\pm$ 0.7 |
|            | Kinu Nijo 6     | 2.3 $\pm$ 0.1   | 2.2 $\pm$ 0.3  | 2 $\pm$ 0.2   | 2.2 $\pm$ 0.1 |
|            | Franklin        | 3 $\pm$ 0.2     | 6.3 $\pm$ 0.3  | 7.8 $\pm$ 0.3 | 8.3 $\pm$ 0.3 |
|            | YYXT            | 2.3 $\pm$ 0.2   | 4.8 $\pm$ 0.2  | 6.4 $\pm$ 0.3 | 6.8 $\pm$ 0.1 |

**Table S4.** Genotypic variability in spike number of plants grown under various K<sup>+</sup> supply. Data are mean  $\pm$  SE (n = 6). Genotypes have been divided into three group according to cluster analysis (see section 3.1 and Figure 1).

|            | Genotype    | K <sup>+</sup> concentration (mM) |               |               |               |
|------------|-------------|-----------------------------------|---------------|---------------|---------------|
|            |             | 0.002 mM                          | 0.02 mM       | 2 mM          | 20 mM         |
| <b>G 1</b> | ZuG403      | 1.7 $\pm$ 0.3                     | 4.9 $\pm$ 1.4 | 5.5 $\pm$ 0.2 | 4.3 $\pm$ 0.3 |
|            | YUQS        | 1.2 $\pm$ 0.8                     | 4.4 $\pm$ 0.6 | 2.9 $\pm$ 0.2 | 3.6 $\pm$ 0.3 |
|            | Keel        | 2.5 $\pm$ 0.1                     | 2.2 $\pm$ 0.5 | 3.3 $\pm$ 0.8 | 3.2 $\pm$ 0.2 |
|            | YSM1        | 1.9 $\pm$ 0.4                     | 2.8 $\pm$ 0.3 | 1.9 $\pm$ 0.3 | 2.4 $\pm$ 0.6 |
|            | YSM3        | 1.8 $\pm$ 0.2                     | 2.6 $\pm$ 0.1 | 2.7 $\pm$ 0.3 | 1.8 $\pm$ 0.1 |
|            | ZP2         | 2.1 $\pm$ 0.4                     | 4.3 $\pm$ 0.3 | 2.7 $\pm$ 0.2 | 3.3 $\pm$ 0.1 |
|            | Flagship    | 2.8 $\pm$ 0.1                     | 2.8 $\pm$ 1.1 | 2.7 $\pm$ 0.2 | 1.8 $\pm$ 0.8 |
|            | Dash        | 1.1 $\pm$ 0.1                     | 2.1 $\pm$ 0.3 | 2 $\pm$ 0.1   | 1.4 $\pm$ 0.1 |
|            | Gebeina     | 0.9 $\pm$ 0.1                     | 4.1 $\pm$ 0.9 | 2.8 $\pm$ 0.2 | 2 $\pm$ 0.4   |
| <b>G 2</b> | Skiff       | 2.9 $\pm$ 0.1                     | 2.5 $\pm$ 0.2 | 3.4 $\pm$ 0.6 | 2.5 $\pm$ 0.2 |
|            | ZUG293      | 1.1 $\pm$ 0.1                     | 2.8 $\pm$ 0.1 | 2.3 $\pm$ 0.1 | 5.2 $\pm$ 0.1 |
|            | Gairdner    | 1.2 $\pm$ 0.1                     | 1.8 $\pm$ 0.3 | 2.3 $\pm$ 0.1 | 1.9 $\pm$ 0.3 |
|            | Yerong      | 1.7 $\pm$ 0.2                     | 1.8 $\pm$ 0.1 | 1.6 $\pm$ 0.1 | 1.4 $\pm$ 0.1 |
|            | Schooner    | 2.3 $\pm$ 0.2                     | 1.8 $\pm$ 0.3 | 2.3 $\pm$ 0.3 | 2.2 $\pm$ 0.1 |
|            | YF374       | 2.6 $\pm$ 0.1                     | 3.4 $\pm$ 0.8 | 3.5 $\pm$ 0.1 | 2.1 $\pm$ 0.6 |
|            | CM72        | 1.8 $\pm$ 0.3                     | 2.5 $\pm$ 0.5 | 3.1 $\pm$ 0.4 | 3.9 $\pm$ 0.3 |
| <b>G 3</b> | RGZLL       | 0.1 $\pm$ 0.1                     | 0.8 $\pm$ 0.1 | 1.6 $\pm$ 0.1 | 1.3 $\pm$ 0.3 |
|            | Yan90260    | 2.2 $\pm$ 0.2                     | 1.2 $\pm$ 0.2 | 2.6 $\pm$ 0.9 | 1.4 $\pm$ 0.4 |
|            | Yiwu Rrleng | 1.2 $\pm$ 1.2                     | 1.8 $\pm$ 0.2 | 1 $\pm$ 0.7   | 0.7 $\pm$ 0.3 |
|            | Dayton      | 0.1 $\pm$ 0.1                     | 0.8 $\pm$ 0.1 | 1.1 $\pm$ 0.1 | 1.9 $\pm$ 0.1 |
|            | DYSYH       | 0.1 $\pm$ 0.1                     | 1 $\pm$ 0.1   | 1.2 $\pm$ 0.3 | 1.3 $\pm$ 0.3 |
|            | Yan89110    | 2 $\pm$ 0.5                       | 1.6 $\pm$ 0.1 | 2.8 $\pm$ 0.4 | 1.3 $\pm$ 0.1 |
|            | Numar       | 1.4 $\pm$ 0.3                     | 2.6 $\pm$ 0.1 | 3.3 $\pm$ 0.1 | 2.3 $\pm$ 0.9 |
|            | Yu 6472     | 1.6 $\pm$ 0.1                     | 1.8 $\pm$ 0.3 | 2.6 $\pm$ 0.4 | 1.5 $\pm$ 0.3 |
|            | Naso Nijo   | 2.3 $\pm$ 0.2                     | 1.7 $\pm$ 0.5 | 1.6 $\pm$ 0.1 | 1.3 $\pm$ 0.1 |
|            | TX9425      | 1.8 $\pm$ 0.7                     | 2.4 $\pm$ 0.3 | 3.2 $\pm$ 0.2 | 1.5 $\pm$ 0.5 |
|            | TF026       | 2.3 $\pm$ 0.8                     | 2.1 $\pm$ 0.4 | 1.8 $\pm$ 0.1 | 2 $\pm$ 0.7   |
|            | Kinu Nijo 6 | 1.5 $\pm$ 0.2                     | 1 $\pm$ 0.1   | 0.8 $\pm$ 0.2 | 1.2 $\pm$ 0.2 |
|            | Franklin    | 0.5 $\pm$ 0.1                     | 0.3 $\pm$ 0.1 | 0.2 $\pm$ 0.2 | 2.3 $\pm$ 0.4 |
|            | YYXT        | 1 $\pm$ 0.2                       | 1 $\pm$ 0.2   | 1.7 $\pm$ 0.2 | 2.5 $\pm$ 0.1 |
